# Supplementary material for: Atomic structures of anthrax toxin protective antigen channels bound to partially unfolded lethal and edema factors
Source: PubMed Central journal article supplement (PMC7012834; doi:10.1038/s41467-020-14658-6), 2020-02-11
Supplement: 41467_2020_14658_MOESM1_ESM.pdf [file 41467_2020_14658_MOESM1_ESM.pdf]

**Supplementary Information**

**Atomic structures of anthrax toxin protective antigen channels bound  
to partially unfolded lethal and edema factors**

**Nathan J. Hardenbrook, Shiheng Liu, Kang Zhou, Koyel Ghosal, Z. Hong Zhou, Bryan A.  
Krantz**

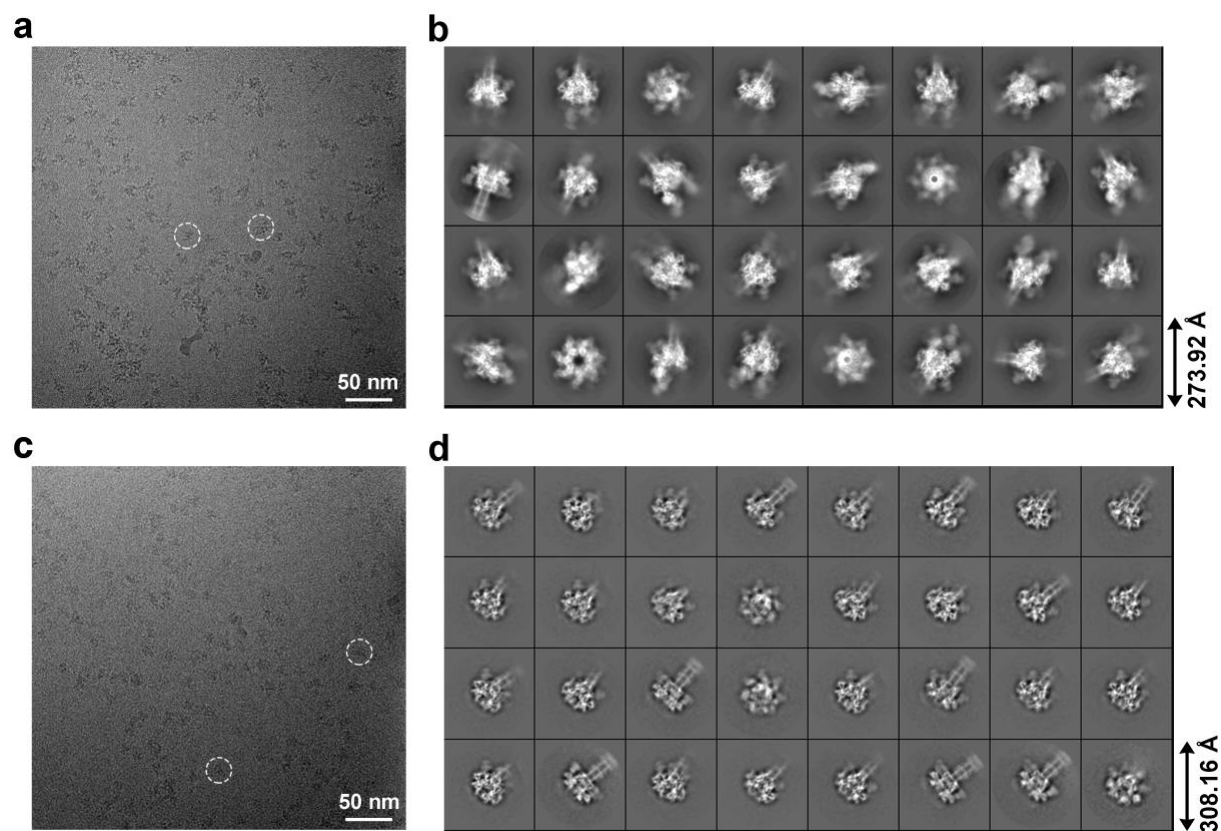

**Supplementary Figure 1. Cryo-EM image and 2D classification of LF-bound and EF-bound PA channels.**

**a**, A cryo-EM micrograph of the EF-bound PA channels after drift correction. **b**, Representative 2D class averages of EF-bound PA channels obtained in RELION. **c**, A cryo-EM micrograph of the LF-bound PA channel after drift correction. **d**, Representative 2D class averages of LF-bound PA channel obtained in RELION. The scale bars in panels a and c are 50 nm.

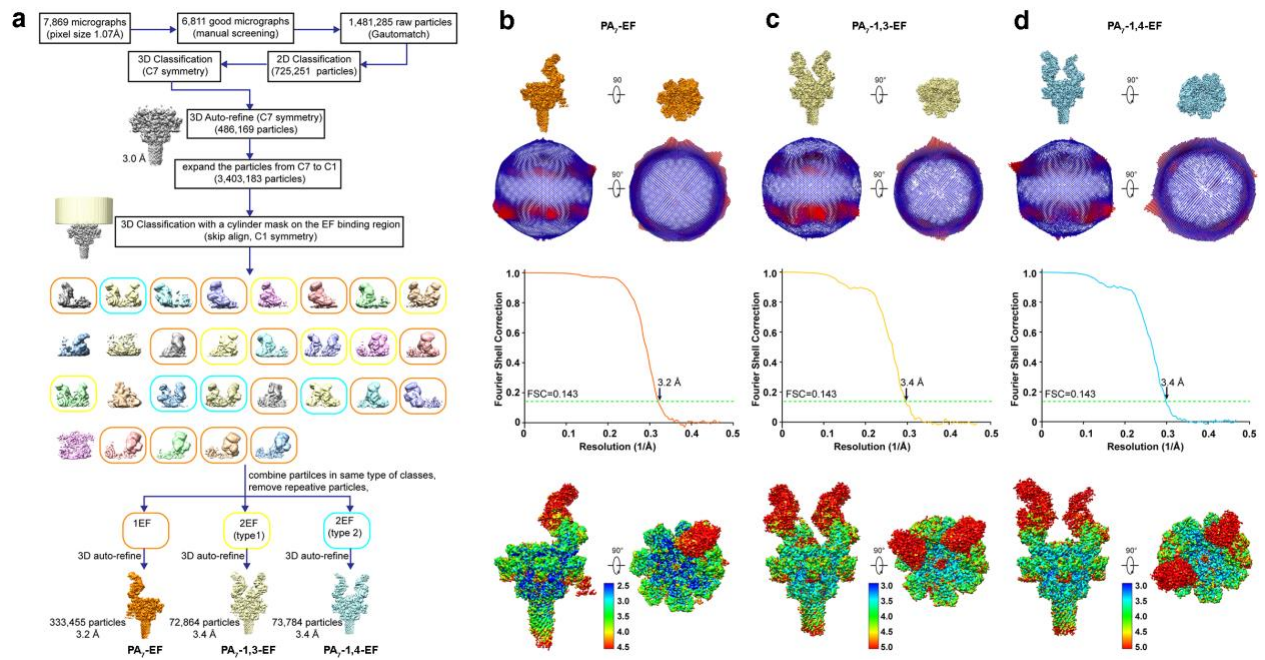

## Supplementary Figure 2. Structural determination process for EF-bound PA channels.

**a**, Data processing workflow. See Materials and Methods for more details. **b-d**, Upper panels: angular distribution for all particles used for the final maps; middle panels: FSC as a function of spatial frequency demonstrating the resolution for the final reconstruction; lower panels: *Resmap* local resolution estimation.

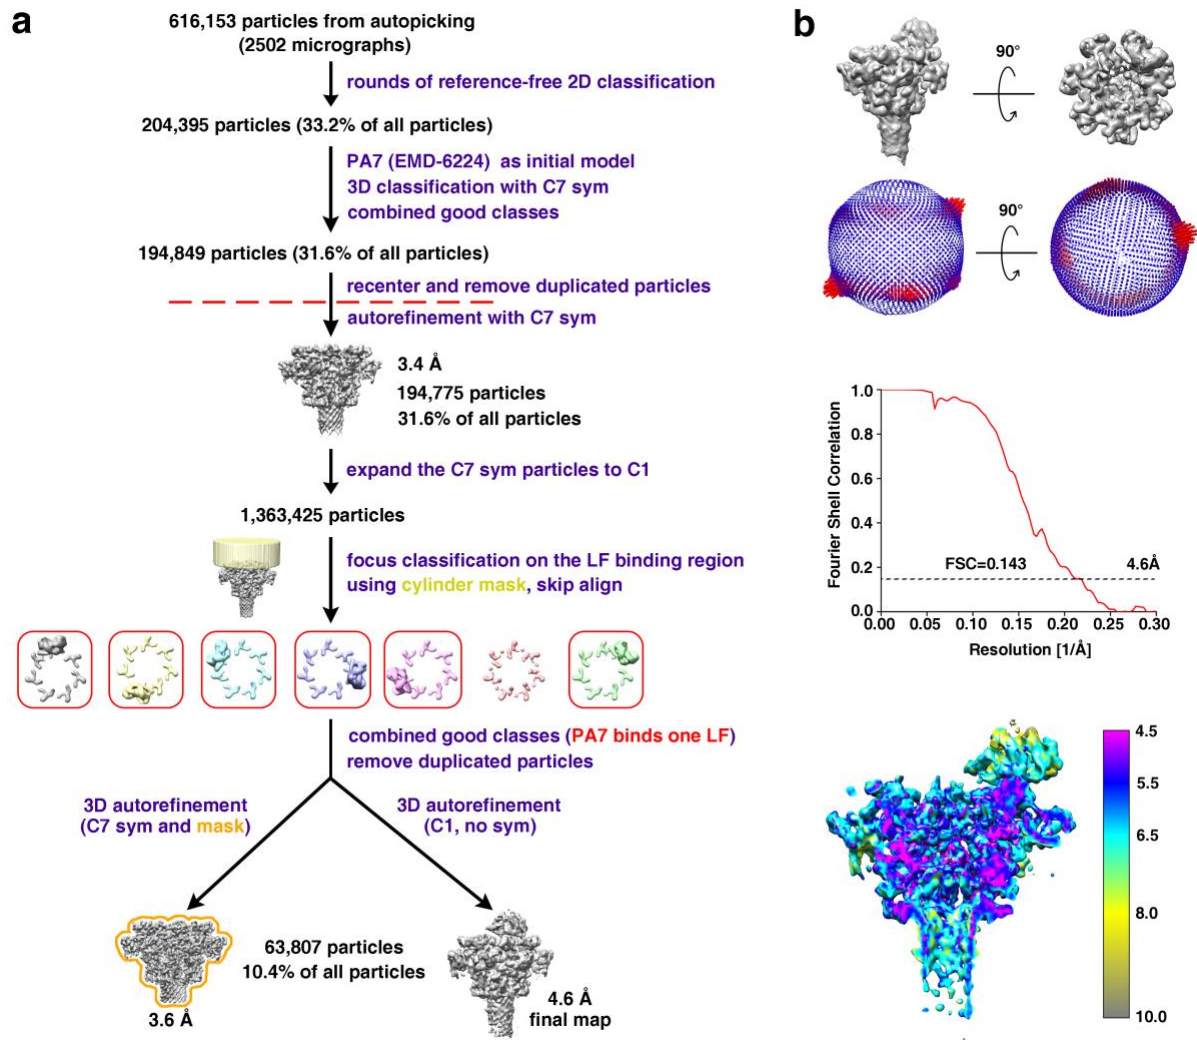

**Supplementary Figure 3. Structural determination process for the LF-bound PA channel.**

**a**, Data processing workflow. For processing above the red dash line, the particle images were binned to a pixel size of 2.14 Å. The rest of processing was performed with a pixel size of 1.07 Å. See Materials and Methods for more details. **b**, Upper panel: angular distribution for all particles used for the final map; middle panel: FSC as a function of spatial frequency demonstrating the resolution for the final reconstruction; lower panel: *Resmap* local resolution estimation.

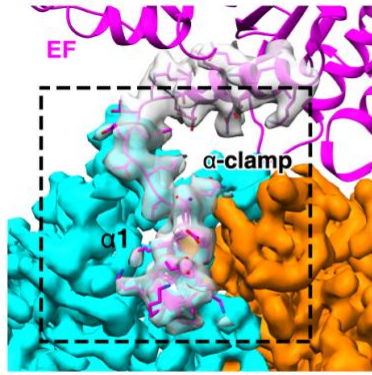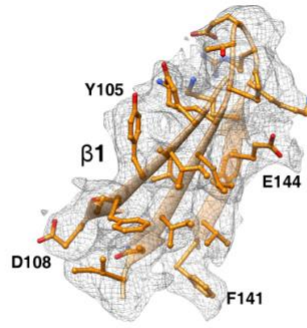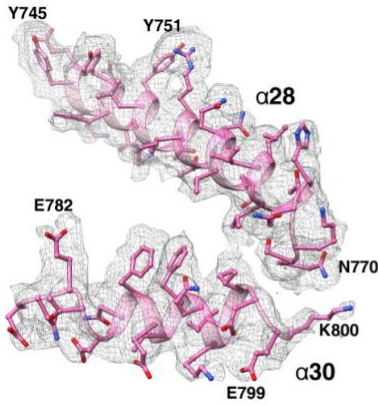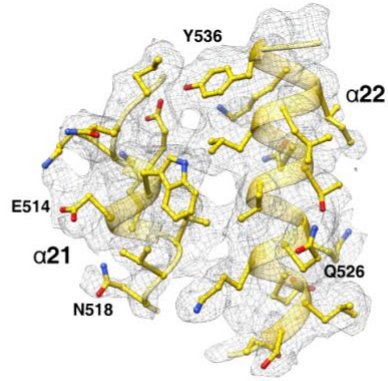

EF in PA<sub>7</sub>-EF

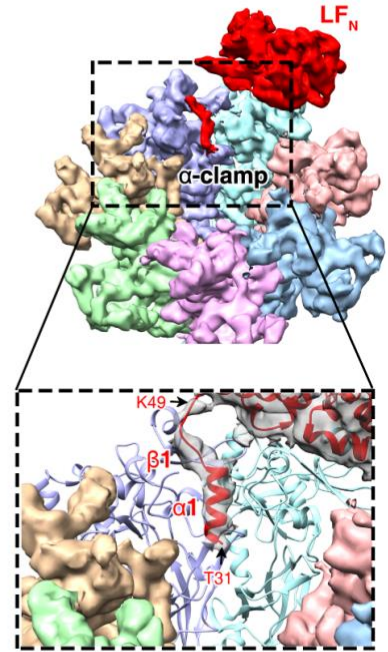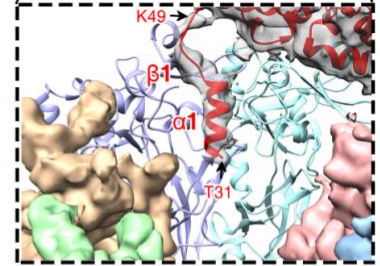

LF in PA<sub>7</sub>-LF

Supplementary Figure 4. Representative cryo-EM density maps for both EF and LF complexed with PA channels.

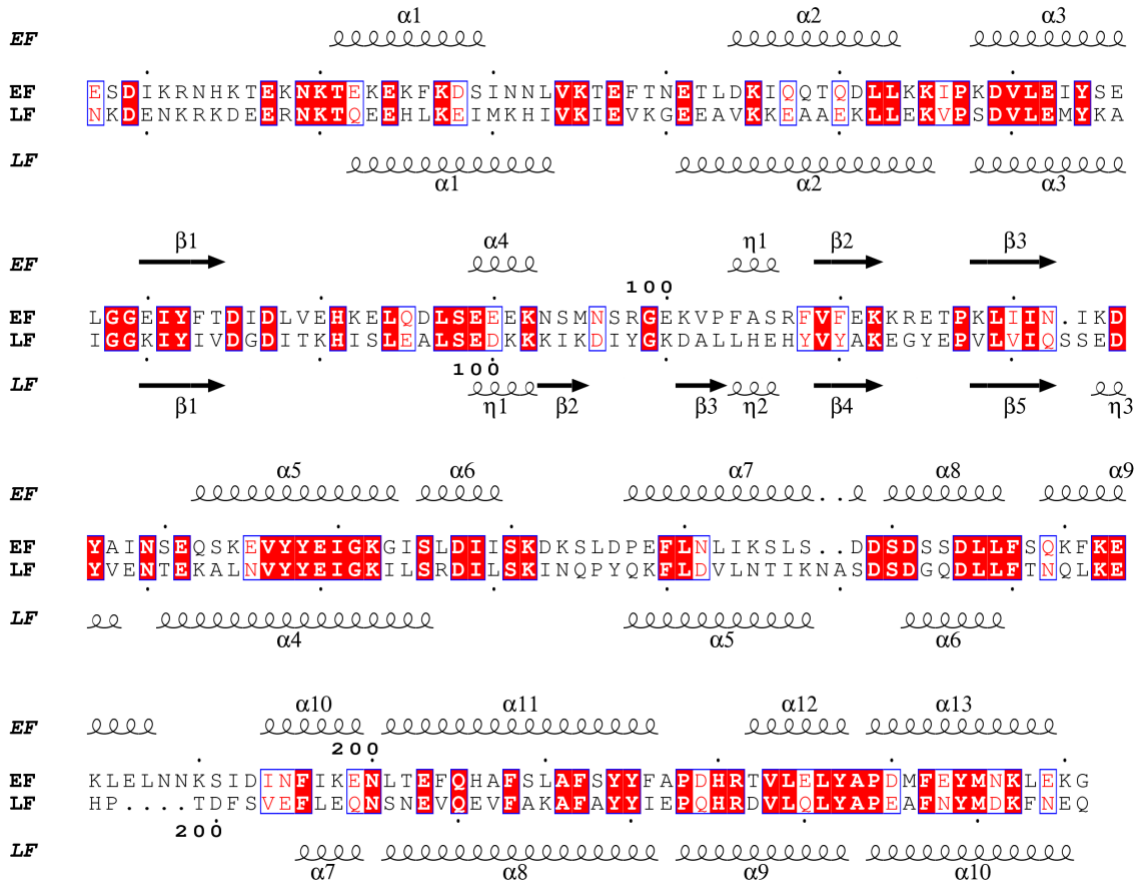

**Supplementary Figure 5. Sequence conservation analysis between LF and EF.**

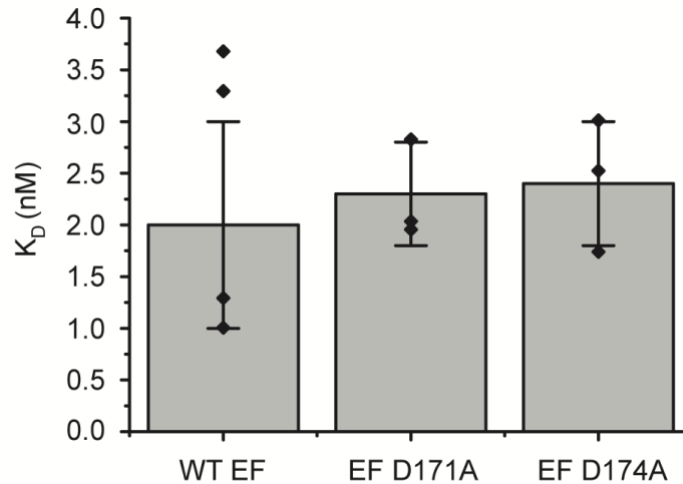

**Supplementary Figure 6. Binding affinities of EF binding interface mutants.**

Ensemble lipid bilayer measurements of binding affinities. Binding of EF and salt bridge mutants to PA channels at symmetric pH 7.0 and asymmetrical KCl (100 mM [added KCl]<sub>cis</sub>, 0 mM [added KCl]<sub>trans</sub>). At the stabilization of the ensemble current at about 4000-5000 pA, EF or salt bridge mutants were added in small increments to the cis and allowed to equilibrate. Final current values were determined. Curves were fit in ORIGIN9. Error bars represent standard deviation of the equilibrium dissociation constant ( $K_D$ ) for three or four independent measurements.

**Supplementary Table 1. EF Mutagenesis Primers**

| Primer Name      | Sequence              |
|------------------|-----------------------|
| EF D171A Forward | 5'-GACTAAATAAAAGGT-3' |
| EF D171A Reverse | 5'-TAAGAGTTTAAGCGA-3' |
| EF D174A Forward | 5'-CTTTAAATTTTTGAC-3' |
| EF D174A Reverse | 5'-TTAAGCGATGATAGT-3' |



**Supplementary Table 2. CryoEM data collection and refinement statistics.**

| Data collection                            | LF complex      |           | EF complex      |            |
|--------------------------------------------|-----------------|-----------|-----------------|------------|
|                                            | PA7-LF          | PA7-EF    | PA7-1,3-EF      | PA7-1,4-EF |
| EM equipment                               | FEI Titan Krios |           | FEI Titan Krios |            |
| Voltage (KV)                               | 300             |           | 300             |            |
| Detector                                   | Gatan K2        |           | Gatan K2        |            |
| Pixel size (Å)                             | 1.07            |           | 1.07            |            |
| Electron dose (e-/Å <sup>2</sup> )         | 62.9            |           | 60.2            |            |
| Defocus range (µm)                         | -1.5 ~ -3.0     |           | 1.5 ~ -3.0      |            |
| <b>Reconstruction</b>                      |                 |           |                 |            |
| Software                                   | RELION2.1       |           | RELION2.1       |            |
| Number of used particles                   | 63,807          | 333,455   | 72,864          | 73,784     |
| Accuracy of rotation (°)                   | 2.51            | 1.62      | 1.36            | 1.41       |
| Accuracy of translation (pixels)           | 1.70            | 0.76      | 0.71            | 0.72       |
| Map sharpening B-factors (Å <sup>2</sup> ) | -169.7          | -80       | -80             | -80        |
| Resolution FSC 0.143 (Å)                   | 4.6             | 3.2       | 3.4             | 3.4        |
| <b>Model building</b>                      |                 |           |                 |            |
| Software                                   | COOT            | COOT      | COOT            | COOT       |
| <b>Refinement</b>                          |                 |           |                 |            |
| Software                                   | PHENIX          | PHENIX    | PHENIX          | PHENIX     |
| Resolution (Å)                             | 4.6             | 3.2       | 3.4             | 3.4        |
| R-factor                                   | 0.37            |           |                 |            |
| Number of protein residues                 | 4,154           | 3,681     | 4,401           | 4,401      |
| Map CC                                     | 0.81            | 0.86      | 0.84            | 0.85       |
| R.m.s deviations                           |                 |           |                 |            |
| Bonds length (Å)                           | 0.01            | 0.01      | 0.01            | 0.01       |
| Bonds angle (°)                            | 1.15            | 1.17      | 0.90            | 0.94       |
| Ramachandran plot statistics (%)           |                 |           |                 |            |
| Preferred                                  | 96.67           | 95.49     | 93.30           | 92.72      |
| Allowed                                    | 3.33            | 4.51      | 6.69            | 7.18       |
| Outlier                                    | 0               | 0         | 0               | 0.1        |
| Rotamers outliers (%)                      | 0.40            | 0.29      | 0.21            | 0.35       |
| C-beta deviations                          | 0               | 0         | 0               | 0          |
| Clash score                                | 6.78            | 4.83      | 5.34            | 5.24       |
| MolProbity score                           | 1.59            | 1.57      | 1.72            | 1.74       |
| PDB code                                   | 6PSN            | 6UZB      | 6UZD            | 6UZE       |
| EMDB code                                  | EMD-20459       | EMD-20955 | EMD-20957       | EMD-20958  |
